# Supplementary material
Source: PubMed Central journal article supplement (PMC2631237)
Supplement: NIHMS86678-supplement-2_si_002.pdf [file NIHMS86678-supplement-2_si_002.pdf]

## Supplementary Data

# Accommodation of an N-(deoxyguanosin-8-yl)-2-acetylaminofluorene adduct in the active site of human DNA polymerase $\alpha$ : Hoogsteen or Watson-Crick base pairing?<sup>†</sup>

*Kerry Donny-Clark<sup>‡</sup>, Robert Shapiro<sup>§</sup>, and Suse Broyde<sup>‡,\*</sup>*

<sup>‡</sup>Department of Biology and <sup>§</sup>Department of Chemistry, New York University, New York, NY, 10003, USA

Running Title: Bypassing a bulky major groove dG-AAF adduct in pol $\alpha$

<sup>†</sup>This research is supported by NIH CA75449 to S.B. and R.S., and by the National Science Foundation through TeraGrid resources provided by the San Diego Supercomputer Center. Support for computational infrastructure and systems management was also provided by NIH CA28038 to S.B. and R.S. The content is solely the responsibility of the authors and does not necessarily represent the official views of the National Cancer Institute or the National Institutes of Health.

\*Corresponding author: Suse Broyde, Tel. (212) 998-8231, Fax (212) 995-4015, Email: [broyde@nyu.edu](mailto:broyde@nyu.edu)

**Table S1: Torsion angles for initial dG-AAF structures.**

| Structure       | $\chi(^{\circ})$ | $\alpha'(^{\circ})$ | $\beta'(^{\circ})$ | $\gamma'(^{\circ})$ |
|-----------------|------------------|---------------------|--------------------|---------------------|
| HG Unmodified   | 64.9             | N/A                 | N/A                | N/A                 |
| HG-AAF1         | 61.2             | 138.3               | 357.5              | 195.9               |
| HG-AAF2         | 61.2             | 138.3               | 214.8              | 195.9               |
| HG-AAF3         | 61.2             | 183.9               | 6.8                | 204.3               |
| HG-AAF4         | 61.2             | 183.9               | 186.9              | 204.3               |
| WC Unmodified 1 | 254.1            | N/A                 | N/A                | N/A                 |
| WC Unmodified 2 | 169.8            | N/A                 | N/A                | N/A                 |
| WC-AAF1         | 192.7            | 260.7               | 203.9              | 160.7               |
| WC-AAF2         | 192.7            | 82.1                | 163.1              | 160.7               |
| WC-AAF3         | 192.7            | 260.7               | 344.4              | 160.7               |
| WC-AAF4         | 192.7            | 82.1                | 339.1              | 160.7               |

**Table S2: Atom types, topologies, and partial charges for dG-AAF.**

| Atom Name | Atom Type | Topology Type | Partial Charge |
|-----------|-----------|---------------|----------------|
| P         | P         | M             | 1.135035       |
| O1P       | O2        | E             | -0.802764      |
| O2P       | O2        | E             | -0.802764      |
| O5'       | OS        | M             | -0.494340      |
| C5'       | CT        | M             | 0.045138       |
| H5'1      | H1        | E             | 0.063861       |
| H5'2      | H1        | E             | 0.063861       |
| C4'       | CT        | M             | 0.180138       |
| H4'       | H1        | E             | 0.108174       |

|      |    |   |           |
|------|----|---|-----------|
| O4'  | OS | S | -0.450678 |
| C1'  | CT | 3 | 0.041166  |
| H1'  | H2 | E | 0.138883  |
| C2'  | CT | B | -0.164433 |
| H2'1 | HC | E | 0.105277  |
| H2'2 | HC | E | 0.105277  |
| N9   | N* | B | 0.075941  |
| C4   | CB | S | -0.028326 |
| N3   | NC | S | -0.182524 |
| C2   | CA | B | 0.431628  |
| N2   | N2 | B | -0.919351 |
| H21  | H  | E | 0.440359  |
| H22  | H  | E | 0.440359  |
| N1   | NA | B | -0.332623 |
| H1   | H  | E | 0.321305  |
| C6   | C  | B | 0.402236  |
| O6   | O  | E | -0.556027 |
| C5   | CB | S | 0.195340  |
| N7   | NB | E | -0.537343 |
| C8   | CK | S | 0.237276  |
| N14  | N* | B | 0.048353  |
| C18  | C  | B | 0.504024  |
| OAce | O  | E | -0.549076 |
| C19  | CT | 3 | -0.262061 |
| H191 | HC | E | 0.081507  |
| H192 | HC | E | 0.081507  |
| H193 | HC | E | 0.081507  |
| C15  | CA | S | 0.017160  |
| C14  | CA | B | -0.309590 |

|      |    |   |           |
|------|----|---|-----------|
| H14  | HA | E | 0.232032  |
| C13  | CB | S | 0.026232  |
| C12  | CT | 3 | -0.001508 |
| H121 | HC | E | 0.043781  |
| H122 | HC | E | 0.043781  |
| C11  | CB | S | 0.042214  |
| C10  | CA | B | -0.200667 |
| H10  | HA | E | 0.140661  |
| C9   | CA | B | -0.140804 |
| H9   | HA | E | 0.139289  |
| C7   | CA | B | -0.156272 |
| H7   | HA | E | 0.142396  |
| C3   | CA | B | -0.179500 |
| H3   | HA | E | 0.152272  |
| C    | CB | S | 0.020935  |
| C1   | CB | S | 0.032255  |
| C17  | CA | B | -0.192244 |
| H17  | HA | E | 0.163321  |
| C16  | CA | S | -0.155998 |
| H16  | HA | E | 0.201481  |
| C3'  | CT | M | 0.118551  |
| H3'  | H1 | E | 0.074903  |
| O3'  | OS | M | -0.500524 |

**Table S3: Atom types, topologies, and partial charges for dCTP<sup>+</sup>.**

| Atom Name | Atom Type | Topology Type | Partial Charge |
|-----------|-----------|---------------|----------------|
| O1G       | O2        | M             | -0.93283       |
| PG        | P         | M             | 1.35374        |
| O2G       | O2        | E             | -1.01588       |
| O3G       | O2        | E             | -0.98337       |
| O3B       | OS        | M             | -0.53323       |
| PB        | P         | M             | 1.28778        |
| O1B       | O2        | E             | -0.92812       |
| O2B       | O2        | E             | -0.78988       |
| O3A       | OS        | M             | -0.56804       |
| PA        | P         | M             | 1.11343        |
| O1A       | O2        | E             | -0.70413       |
| O2A       | O2        | E             | -0.85764       |
| O5'       | OS        | M             | -0.52751       |
| C5'       | CT        | M             | 0.05539        |
| H5'1      | H1        | E             | 0.07799        |
| H5'2      | H1        | E             | 0.06574        |
| C4'       | CT        | M             | 0.42413        |
| H4'       | H1        | E             | -0.00175       |
| C3'       | CT        | 3             | 0.54226        |
| H3'       | H1        | E             | -0.07755       |
| C2'       | CT        | B             | -0.03056       |
| H2'1      | HC        | E             | 0.00359        |
| H2'2      | HC        | E             | 0.04303        |
| O3'       | OH        | S             | -0.78480       |

|      |    |   |          |
|------|----|---|----------|
| HO3' | HO | E | 0.45144  |
| O4'  | OS | M | -0.57857 |
| C1'  | CT | M | 0.11238  |
| H1'  | H2 | E | 0.17464  |
| N1   | N* | M | 0.11879  |
| C6   | CM | M | 0.06361  |
| H6   | H4 | E | 0.23845  |
| C5   | CM | M | -0.37365 |
| H5   | HA | E | 0.20924  |
| C4   | CA | M | 0.46441  |
| N4   | N2 | B | -0.93663 |
| H41  | H  | E | 0.42684  |
| H42  | H  | E | 0.48657  |
| N3   | N3 | M | -0.14236 |
| H3   | H  | E | 0.31250  |
| C2   | C  | S | 0.30474  |
| O2   | O  | E | -0.56418 |

**Table S4: AMBER parameters for dG-AAF and dCTP<sup>+</sup>.**

| Bond  | $K_r$ kcal/(mol Å <sup>2</sup> ) | $r_{eq}$ Å |
|-------|----------------------------------|------------|
| C-N3  | 255.5                            | 1.41       |
| CA-N* | 449.0                            | 1.42       |
| CA-N3 | 325.6                            | 1.36       |
| CT-CB | 331.3                            | 1.51       |
|       |                                  |            |

| Angle     | $K_0$ kcal/(mol radian <sup>2</sup> ) |                  | $\theta$ degrees |          |
|-----------|---------------------------------------|------------------|------------------|----------|
| CT-C-N*   | 68.2                                  |                  | 115.38           |          |
| N*-C-N3   | 68.3                                  |                  | 113.84           |          |
| N3-C-O    | 74.1                                  |                  | 122.00           |          |
| CM-CA-N3  | 67.4                                  |                  | 117.17           |          |
| N2-CA-N3  | 72.6                                  |                  | 119.52           |          |
| CA-CA-N*  | 69.3                                  |                  | 119.50           |          |
| CA-CB-CT  | 63.2                                  |                  | 129.10           |          |
| CB-CB-CB  | 64.5                                  |                  | 108.05           |          |
| CB-CB-CT  | 63.3                                  |                  | 110.80           |          |
| N*-CK-N*  | 72.9                                  |                  | 119.87           |          |
| HC-CT-CB  | 47.0                                  |                  | 128.96           |          |
| CB-CT-CB  | 65.5                                  |                  | 102.11           |          |
| C-N*-CA   | 65.6                                  |                  | 125.26           |          |
| CK-N*-C   | 65.6                                  |                  | 117.13           |          |
| CK-N*-CA  | 64.3                                  |                  | 117.46           |          |
| C-N3-H    | 46.4                                  |                  | 112.50           |          |
| CA-N3-C   | 65.4                                  |                  | 126.11           |          |
| CA-N3-H   | 49.1                                  |                  | 121.39           |          |
|           |                                       |                  |                  |          |
| Torsion   | # of paths                            | $V_n/2$ kcal/mol | $\gamma$ degrees | <b>n</b> |
| X-CA-N*-X | 4                                     | 4.2              | 180.0            | 2        |
| X-CT-CB-X | 6                                     | 0.0              | 0.0              | 2        |

**Table S5: Hydrogen bond occupancies between the templating dG/dG-AAF and the incoming dCTP/dCTP<sup>+</sup> for the stable region (last 4 ns) of each trajectory. All bonds are represented as donor residue(donor heavy atom)...acceptor residue(acceptor heavy atom), followed by percent occupancy.**

|                        |                                     |       |
|------------------------|-------------------------------------|-------|
| <b>HG Unmodified</b>   | dCTP <sup>+</sup> (N3)...dG(N7)     | 99.32 |
|                        | dCTP <sup>+</sup> (N4)...dG(N7)     | 4.72  |
|                        | dCTP <sup>+</sup> (N4)...dG(O6)     | 99.72 |
| <b>HG-AAF1</b>         | dCTP <sup>+</sup> (N3)...dG-AAF(N7) | 1.00  |
| <b>HG-AAF2</b>         | None                                |       |
| <b>HG-AAF3</b>         | dCTP <sup>+</sup> (N4)...dG-AAF(N7) | 42.73 |
|                        | dCTP <sup>+</sup> (N4)...dG-AAF(O6) | 4.28  |
|                        | dCTP <sup>+</sup> (N4)...dG-AAF(O6) | 73.03 |
| <b>HG-AAF4</b>         | dCTP <sup>+</sup> (N3)...dG-AAF(N7) | 33.40 |
|                        | dCTP <sup>+</sup> (N4)...dG-AAF(N7) | 16.93 |
|                        | dCTP <sup>+</sup> (N4)...dG-AAF(O6) | 86.59 |
| <b>WC Unmodified 1</b> | dCTP(N4)...dG(O6)                   | 92.95 |
|                        | dG(N1)...dCTP(N3)                   | 99.93 |
|                        | dG(N2)...dCTP(N3)                   | 63.11 |
|                        | dG(N2)...dCTP(O2)                   | 99.93 |
| <b>WC Unmodified 2</b> | dCTP(N4)...dG(O6)                   | 98.35 |
|                        | dG(N1)...dCTP(N3)                   | 100.0 |
|                        | dG(N2)...dCTP(N3)                   | 34.29 |
|                        | dG(N2)...dCTP(O2)                   | 99.76 |
| <b>WC-AAF1</b>         | dCTP(N4)...dG-AAF(O6)               | 58.78 |
|                        | dG-AAF(N1)...dCTP(N3)               | 81.70 |
|                        | dG-AAF(N1)...dCTP(O2)               | 68.80 |
|                        | dG-AAF(N2)...dCTP(N3)               | 8.03  |
|                        | dG-AAF(N2)...dCTP(O2)               | 99.98 |



|                |                       |        |
|----------------|-----------------------|--------|
| <b>WC-AAF2</b> | dCTP(N4)...dG-AAF(O6) | 99.08  |
|                | dG-AAF(N1)...dCTP(N3) | 100.00 |
|                | dG-AAF(N1)...dCTP(O2) | 4.95   |
|                | dG-AAF(N2)...dCTP(N3) | 19.55  |
|                | dG-AAF(N2)...dCTP(O2) | 99.80  |
| <b>WC-AAF3</b> | dCTP(N4)...dG-AAF(O6) | 93.75  |
|                | dG-AAF(N1)...dCTP(N3) | 100.00 |
|                | dG-AAF(N1)...dCTP(O2) | 18.05  |
|                | dG-AAF(N2)...dCTP(N3) | 11.75  |
|                | dG-AAF(N2)...dCTP(O2) | 100.00 |
| <b>WC-AAF4</b> | dCTP(N4)...dG-AAF(O6) | 89.05  |
|                | dG-AAF(N1)...dCTP(N3) | 99.78  |
|                | dG-AAF(N1)...dCTP(O2) | 1.45   |
|                | dG-AAF(N2)...dCTP(N3) | 39.83  |
|                | dG-AAF(N2)...dCTP(O2) | 99.95  |

**Table S6: Hydrogen bond occupancies between the incoming dCTP/dCTP<sup>+</sup> and polt for the stable region (last 4 ns) of each trajectory. Amino acid numbering scheme taken from the ternary crystal structure(Nair et al., 2005), PDB ID: 2ALZ. All bonds are represented as donor residue(donor heavy atom)...acceptor residue(acceptor heavy atom), followed by percent occupancy.**

|                      |                                                   |        |
|----------------------|---------------------------------------------------|--------|
| <b>HG Unmodified</b> | ARG61(N1)...dCTP <sup>+</sup> (O2G)               | 76.61  |
|                      | ARG61(N1)...dCTP <sup>+</sup> (O3G)               | 70.03  |
|                      | ARG61(N2)...dCTP <sup>+</sup> (O2G)               | 7.93   |
|                      | ARG61(N2)...dCTP <sup>+</sup> (O3B)               | 97.77  |
|                      | ARG61(N2)...dCTP <sup>+</sup> (O3G)               | 83.28  |
|                      | dCTP <sup>+</sup> (O3')...dCTP <sup>+</sup> (O1B) | 100.00 |
|                      | CYS37(N)...dCTP <sup>+</sup> (O1G)                | 6.20   |
|                      | CYS37(N)...dCTP <sup>+</sup> (O3B)                | 39.30  |
|                      | CYS37(N)...dCTP <sup>+</sup> (O3G)                | 99.00  |
|                      | LYS214(NZ)...dCTP <sup>+</sup> (O1G)              | 3.50   |
|                      | LYS214(NZ)...dCTP <sup>+</sup> (O2G)              | 16.03  |
|                      | LYS214(NZ)...dCTP <sup>+</sup> (O3G)              | 11.57  |
|                      | LYS214(NZ)...dCTP <sup>+</sup> (O1G)              | 4.63   |
|                      | LYS214(NZ)...dCTP <sup>+</sup> (O2G)              | 17.18  |
|                      | LYS214(NZ)...dCTP <sup>+</sup> (O3G)              | 18.67  |
|                      | LYS214(NZ)...dCTP <sup>+</sup> (O1G)              | 2.28   |
|                      | LYS214(NZ)...dCTP <sup>+</sup> (O2G)              | 3.73   |
|                      | LYS214(NZ)...dCTP <sup>+</sup> (O3G)              | 4.75   |
|                      | LYS77(NZ)...dCTP <sup>+</sup> (O2A)               | 27.27  |
|                      | LYS77(NZ)...dCTP <sup>+</sup> (O2G)               | 26.05  |
|                      | LYS77(NZ)...dCTP <sup>+</sup> (O3A)               | 12.28  |
|                      | LYS77(NZ)...dCTP <sup>+</sup> (O2A)               | 45.25  |

|                                     |                                      |                                     |
|-------------------------------------|--------------------------------------|-------------------------------------|
| <b>HG Unmodified</b>                | LYS77(NZ)...dCTP <sup>+</sup> (O2G)  | 27.92                               |
|                                     | LYS77(NZ)...dCTP <sup>+</sup> (O3A)  | 19.88                               |
|                                     | LYS77(NZ)...dCTP <sup>+</sup> (O2A)  | 25.83                               |
|                                     | LYS77(NZ)...dCTP <sup>+</sup> (O2G)  | 45.83                               |
|                                     | LYS77(NZ)...dCTP <sup>+</sup> (O3A)  | 11.78                               |
|                                     | PHE38(N)...dCTP <sup>+</sup> (O1B)   | 2.97                                |
|                                     | PHE38(N)...dCTP <sup>+</sup> (O2B)   | 60.37                               |
|                                     | THR65(OG1)...dCTP <sup>+</sup> (O1B) | 99.97                               |
|                                     | THR65(OG1)...dCTP <sup>+</sup> (O3') | 2.61                                |
|                                     | TYR39(N)...dCTP <sup>+</sup> (O3')   | 16.30                               |
|                                     | <b>HG-AAF1</b>                       | ARG61(N1)...dCTP <sup>+</sup> (O2G) |
| ARG61(N1)...dCTP <sup>+</sup> (O3G) |                                      | 80.60                               |
| ARG61(N2)...dCTP <sup>+</sup> (O2G) |                                      | 3.08                                |
| ARG61(N2)...dCTP <sup>+</sup> (O3B) |                                      | 39.08                               |
| ARG61(N2)...dCTP <sup>+</sup> (O3G) |                                      | 96.23                               |
| CYS37(N)...dCTP <sup>+</sup> (O3B)  |                                      | 7.70                                |
| CYS37(N)...dCTP <sup>+</sup> (O3G)  |                                      | 99.90                               |
| LYS77(NZ)...dCTP <sup>+</sup> (O2A) |                                      | 32.39                               |
| LYS77(NZ)...dCTP <sup>+</sup> (O2G) |                                      | 29.20                               |
| LYS77(NZ)...dCTP <sup>+</sup> (O3A) |                                      | 1.50                                |
| LYS77(NZ)...dCTP <sup>+</sup> (O3B) |                                      | 11.85                               |
| LYS77(NZ)...dCTP <sup>+</sup> (O2A) |                                      | 60.85                               |
| LYS77(NZ)...dCTP <sup>+</sup> (O2G) |                                      | 32.55                               |
| LYS77(NZ)...dCTP <sup>+</sup> (O3A) |                                      | 2.63                                |

|                |                                      |        |
|----------------|--------------------------------------|--------|
| <b>HG-AAF1</b> | LYS77(NZ)...dCTP <sup>+</sup> (O3B)  | 37.45  |
|                | LYS77(NZ)...dCTP <sup>+</sup> (O2A)  | 28.88  |
|                | LYS77(NZ)...dCTP <sup>+</sup> (O2G)  | 62.03  |
|                | LYS77(NZ)...dCTP <sup>+</sup> (O3A)  | 1.73   |
|                | LYS77(NZ)...dCTP <sup>+</sup> (O3B)  | 37.98  |
|                | PHE38(N)...dCTP <sup>+</sup> (O1B)   | 3.78   |
|                | PHE38(N)...dCTP <sup>+</sup> (O2B)   | 30.78  |
|                | THR65(OG1)...dCTP <sup>+</sup> (O1B) | 100.00 |
| <b>HG-AAF2</b> | ARG61(N1)...dCTP <sup>+</sup> (O2G)  | 12.83  |
|                | ARG61(N1)...dCTP <sup>+</sup> (O3G)  | 97.62  |
|                | ARG61(N2)...dCTP <sup>+</sup> (O1B)  | 21.48  |
|                | ARG61(N2)...dCTP <sup>+</sup> (O3B)  | 39.60  |
|                | ARG61(N2)...dCTP <sup>+</sup> (O3G)  | 87.98  |
|                | dCTP <sup>+</sup> (O3')...TYR39(OH)  | 2.80   |
|                | CYS37(N)...dCTP <sup>+</sup> (O3B)   | 37.03  |
|                | CYS37(N)...dCTP <sup>+</sup> (O3G)   | 99.03  |
|                | LYS77(NZ)...dCTP <sup>+</sup> (O2A)  | 16.95  |
|                | LYS77(NZ)...dCTP <sup>+</sup> (O2G)  | 59.23  |
|                | LYS77(NZ)...dCTP <sup>+</sup> (O3A)  | 1.62   |
|                | LYS77(NZ)...dCTP <sup>+</sup> (O3B)  | 38.93  |
|                | LYS77(NZ)...dCTP <sup>+</sup> (O2A)  | 43.23  |
|                | LYS77(NZ)...dCTP <sup>+</sup> (O2G)  | 17.45  |
|                | LYS77(NZ)...dCTP <sup>+</sup> (O3A)  | 2.78   |
|                | LYS77(NZ)...dCTP <sup>+</sup> (O3B)  | 9.70   |

|                |                                                   |        |
|----------------|---------------------------------------------------|--------|
| <b>HG-AAF2</b> | LYS77(NZ)...dCTP <sup>+</sup> (O2A)               | 33.55  |
|                | LYS77(NZ)...dCTP <sup>+</sup> (O2G)               | 68.37  |
|                | LYS77(NZ)...dCTP <sup>+</sup> (O3A)               | 5.08   |
|                | LYS77(NZ)...dCTP <sup>+</sup> (O3B)               | 22.63  |
|                | PHE38(N)...dCTP <sup>+</sup> (O1B)                | 5.43   |
|                | PHE38(N)...dCTP <sup>+</sup> (O2B)                | 81.00  |
|                | THR65(OG1)...dCTP <sup>+</sup> (O1B)              | 99.43  |
|                | TYR39(OH)...dCTP <sup>+</sup> (O3')               | 60.18  |
|                | TYR68(OH)...dCTP <sup>+</sup> (O3G)               | 22.95  |
|                | ARG61(N1)...dCTP <sup>+</sup> (O2G)               | 55.43  |
| <b>HG-AAF3</b> | ARG61(N1)...dCTP <sup>+</sup> (O3B)               | 2.98   |
|                | ARG61(N1)...dCTP <sup>+</sup> (O3G)               | 78.90  |
|                | ARG61(N2)...dCTP <sup>+</sup> (O2G)               | 5.05   |
|                | ARG61(N2)...dCTP <sup>+</sup> (O3B)               | 99.77  |
|                | ARG61(N2)...dCTP <sup>+</sup> (O3G)               | 45.30  |
|                | dCTP <sup>+</sup> (O3')...dCTP <sup>+</sup> (O1B) | 100.00 |
|                | CYS37(N)...dCTP <sup>+</sup> (O3B)                | 23.55  |
|                | CYS37(N)...dCTP <sup>+</sup> (O3G)                | 99.70  |
|                | LYS214(NZ)...dCTP <sup>+</sup> (O1G)              | 34.30  |
|                | LYS214(NZ)...dCTP <sup>+</sup> (O2G)              | 18.75  |
|                | LYS214(NZ)...dCTP <sup>+</sup> (O1G)              | 30.70  |
|                | LYS214(NZ)...dCTP <sup>+</sup> (O2G)              | 37.59  |

|                |                                      |        |
|----------------|--------------------------------------|--------|
| <b>HG-AAF3</b> | LYS214(NZ)...dCTP <sup>+</sup> (O1G) | 23.68  |
|                | LYS214(NZ)...dCTP <sup>+</sup> (O2G) | 18.60  |
|                | LYS77(NZ)...dCTP <sup>+</sup> (O2A)  | 19.05  |
|                | LYS77(NZ)...dCTP <sup>+</sup> (O2G)  | 28.43  |
|                | LYS77(NZ)...dCTP <sup>+</sup> (O3A)  | 8.05   |
|                | LYS77(NZ)...dCTP <sup>+</sup> (O2A)  | 51.58  |
|                | LYS77(NZ)...dCTP <sup>+</sup> (O2G)  | 19.30  |
|                | LYS77(NZ)...dCTP <sup>+</sup> (O3A)  | 17.85  |
|                | LYS77(NZ)...dCTP <sup>+</sup> (O2A)  | 27.62  |
|                | LYS77(NZ)...dCTP <sup>+</sup> (O2G)  | 52.20  |
|                | LYS77(NZ)...dCTP <sup>+</sup> (O3A)  | 37.23  |
|                | PHE38(N)...dCTP <sup>+</sup> (O1B)   | 7.95   |
|                | PHE38(N)...dCTP <sup>+</sup> (O2B)   | 70.83  |
|                | THR65(OG1)...dCTP <sup>+</sup> (O1B) | 100.00 |
|                | THR65(OG1)...dCTP <sup>+</sup> (O3') | 2.62   |
|                | TYR39(N)...dCTP <sup>+</sup> (O3')   | 28.78  |
|                | TYR39(OH)...dCTP <sup>+</sup> (O2)   | 74.48  |
| <b>HG-AAF4</b> | ARG61(N1)...dCTP <sup>+</sup> (O2G)  | 9.30   |
|                | ARG61(N1)...dCTP <sup>+</sup> (O3G)  | 97.80  |
|                | ARG61(N2)...dCTP <sup>+</sup> (O1B)  | 68.28  |
|                | ARG61(N2)...dCTP <sup>+</sup> (O3B)  | 3.78   |
|                | ARG61(N2)...dCTP <sup>+</sup> (O3G)  | 97.39  |
|                | CYS37(N)...dCTP <sup>+</sup> (O1G)   | 38.65  |
|                | CYS37(N)...dCTP <sup>+</sup> (O3G)   | 99.83  |

|                            |                                      |       |
|----------------------------|--------------------------------------|-------|
| <b>HG-AAF4</b>             | LYS214(NZ)...dCTP <sup>+</sup> (O1G) | 3.58  |
|                            | LYS214(NZ)...dCTP <sup>+</sup> (O2G) | 25.68 |
|                            | LYS214(NZ)...dCTP <sup>+</sup> (O1G) | 3.48  |
|                            | LYS214(NZ)...dCTP <sup>+</sup> (O2G) | 11.37 |
|                            | LYS214(NZ)...dCTP <sup>+</sup> (O1G) | 3.88  |
|                            | LYS214(NZ)...dCTP <sup>+</sup> (O2G) | 38.43 |
|                            | LYS77(NZ)...dCTP <sup>+</sup> (O2A)  | 27.55 |
|                            | LYS77(NZ)...dCTP <sup>+</sup> (O2G)  | 16.95 |
|                            | LYS77(NZ)...dCTP <sup>+</sup> (O3A)  | 1.70  |
|                            | LYS77(NZ)...dCTP <sup>+</sup> (O3B)  | 38.25 |
|                            | LYS77(NZ)...dCTP <sup>+</sup> (O2A)  | 34.88 |
|                            | LYS77(NZ)...dCTP <sup>+</sup> (O2G)  | 12.39 |
|                            | LYS77(NZ)...dCTP <sup>+</sup> (O3A)  | 1.59  |
|                            | LYS77(NZ)...dCTP <sup>+</sup> (O3B)  | 12.10 |
|                            | LYS77(NZ)...dCTP <sup>+</sup> (O2A)  | 34.45 |
|                            | LYS77(NZ)...dCTP <sup>+</sup> (O2G)  | 17.23 |
|                            | LYS77(NZ)...dCTP <sup>+</sup> (O3A)  | 2.33  |
|                            | LYS77(NZ)...dCTP <sup>+</sup> (O3B)  | 38.98 |
|                            | PHE38(N)...dCTP <sup>+</sup> (O2B)   | 4.23  |
|                            | THR65(OG1)...dCTP <sup>+</sup> (O1B) | 99.98 |
| <b>WC Unmodified<br/>1</b> | ARG61(N1)...dCTP(O2G)                | 26.39 |
|                            | ARG61(N1)...dCTP(O3B)                | 5.48  |
|                            | ARG61(N1)...dCTP(O3G)                | 88.05 |
|                            | ARG61(N2)...dCTP(O1B)                | 7.30  |

|                            |                        |       |
|----------------------------|------------------------|-------|
| <b>WC Unmodified<br/>1</b> | ARG61(N2)...dCTP(O2G)  | 2.98  |
|                            | ARG61(N2)...dCTP(O3B)  | 99.55 |
|                            | ARG61(N2)...dCTP(O3G)  | 49.30 |
|                            | dCTP(O3')...dCTP(O1B)  | 2.77  |
|                            | CYS37(N)...dCTP(O1G)   | 1.32  |
|                            | CYS37(N)...dCTP(O3B)   | 46.50 |
|                            | CYS37(N)...dCTP(O3G)   | 67.65 |
|                            | LYS214(NZ)...dCTP(O1G) | 10.73 |
|                            | LYS214(NZ)...dCTP(O2G) | 5.39  |
|                            | LYS214(NZ)...dCTP(O3G) | 8.55  |
|                            | LYS214(NZ)...dCTP(O1G) | 5.07  |
|                            | LYS214(NZ)...dCTP(O2G) | 7.80  |
|                            | LYS214(NZ)...dCTP(O3G) | 10.64 |
|                            | LYS214(NZ)...dCTP(O1G) | 9.43  |
|                            | LYS214(NZ)...dCTP(O2G) | 8.61  |
|                            | LYS214(NZ)...dCTP(O3G) | 6.73  |
|                            | LYS77(NZ)...dCTP(O2A)  | 28.39 |
|                            | LYS77(NZ)...dCTP(O2G)  | 23.16 |
|                            | LYS77(NZ)...dCTP(O3A)  | 8.25  |
|                            | LYS77(NZ)...dCTP(O2A)  | 45.23 |
|                            | LYS77(NZ)...dCTP(O2G)  | 25.43 |
|                            | LYS77(NZ)...dCTP(O3A)  | 11.65 |
|                            | LYS77(NZ)...dCTP(O2A)  | 23.11 |
|                            | LYS77(NZ)...dCTP(O2G)  | 65.30 |



|                            |                        |        |
|----------------------------|------------------------|--------|
| <b>WC Unmodified<br/>1</b> | LYS77(NZ)...dCTP(O3A)  | 10.32  |
|                            | PHE38(N)...dCTP(O1B)   | 1.77   |
|                            | PHE38(N)...dCTP(O2B)   | 77.18  |
|                            | THR65(OG1)...dCTP(O1B) | 100.00 |
|                            | TYR39(N)...dCTP(O3')   | 88.16  |
|                            | TYR39(OH)...dCTP(O2)   | 4.02   |
| <b>WC Unmodified<br/>2</b> | ARG61(N1)...dCTP(O2G)  | 46.57  |
|                            | ARG61(N1)...dCTP(O3G)  | 78.35  |
|                            | ARG61(N2)...dCTP(O3B)  | 99.37  |
|                            | ARG61(N2)...dCTP(O3G)  | 49.90  |
|                            | CYS37(N)...dCTP(O3B)   | 45.10  |
|                            | CYS37(N)...dCTP(O3G)   | 86.89  |
|                            | LYS214(NZ)...dCTP(O1G) | 19.21  |
|                            | LYS214(NZ)...dCTP(O2G) | 18.62  |
|                            | LYS214(NZ)...dCTP(O3G) | 11.10  |
|                            | LYS214(NZ)...dCTP(O1G) | 19.17  |
|                            | LYS214(NZ)...dCTP(O2G) | 16.34  |
|                            | LYS214(NZ)...dCTP(O1G) | 12.00  |
|                            | LYS214(NZ)...dCTP(O2G) | 15.10  |
|                            | LYS77(NZ)...dCTP(O2A)  | 18.00  |
|                            | LYS77(NZ)...dCTP(O2G)  | 53.79  |
|                            | LYS77(NZ)...dCTP(O2A)  | 22.13  |
|                            | LYS77(NZ)...dCTP(O2G)  | 19.33  |

|                            |                        |        |
|----------------------------|------------------------|--------|
| <b>WC unmodified<br/>2</b> | LYS77(NZ)...dCTP(O2A)  | 52.75  |
|                            | LYS77(NZ)...dCTP(O2G)  | 23.54  |
|                            | LYS77(NZ)...dCTP(O3A)  | 13.08  |
|                            | PHE38(N)...dCTP(O2B)   | 63.41  |
|                            | THR65(OG1)...dCTP(O1B) | 100.00 |
|                            | TYR39(N)...dCTP(O3')   | 82.90  |
| <b>WC-AAF1</b>             | ARG61(N1)...dCTP(O2G)  | 1.73   |
|                            | ARG61(N1)...dCTP(O3B)  | 7.60   |
|                            | ARG61(N1)...dCTP(O3G)  | 99.10  |
|                            | ARG61(N2)...dCTP(O1B)  | 37.65  |
|                            | ARG61(N2)...dCTP(O2G)  | 2.58   |
|                            | ARG61(N2)...dCTP(O3B)  | 99.70  |
|                            | ARG61(N2)...dCTP(O3G)  | 60.58  |
|                            | dCTP(O3')...dCTP(O1B)  | 8.43   |
|                            | CYS37(N)...dCTP(O3B)   | 62.70  |
|                            | CYS37(N)...dCTP(O3G)   | 50.10  |
|                            | LYS214(NZ)...dCTP(O1G) | 26.59  |
|                            | LYS214(NZ)...dCTP(O2G) | 5.55   |
|                            | LYS214(NZ)...dCTP(O3G) | 17.77  |
|                            | LYS214(NZ)...dCTP(O1G) | 23.62  |
|                            | LYS214(NZ)...dCTP(O2G) | 3.68   |
|                            | LYS214(NZ)...dCTP(O3G) | 39.55  |
|                            | LYS214(NZ)...dCTP(O1G) | 23.45  |
|                            | LYS214(NZ)...dCTP(O2G) | 5.73   |

|                |                        |        |
|----------------|------------------------|--------|
| <b>WC-AAF1</b> | LYS214(NZ)...dCTP(O3G) | 39.18  |
|                | LYS77(NZ)...dCTP(O2A)  | 60.90  |
|                | LYS77(NZ)...dCTP(O2G)  | 26.59  |
|                | LYS77(NZ)...dCTP(O3A)  | 9.68   |
|                | LYS77(NZ)...dCTP(O2A)  | 26.58  |
|                | LYS77(NZ)...dCTP(O2G)  | 39.59  |
|                | LYS77(NZ)...dCTP(O3A)  | 10.10  |
|                | LYS77(NZ)...dCTP(O2A)  | 24.18  |
|                | LYS77(NZ)...dCTP(O2G)  | 29.68  |
|                | LYS77(NZ)...dCTP(O3A)  | 8.95   |
|                | PHE38(N)...dCTP(O1B)   | 1.65   |
|                | PHE38(N)...dCTP(O2B)   | 55.18  |
|                | THR65(OG1)...dCTP(O1B) | 100.00 |
|                | TYR39(N)...dCTP(O3')   | 98.55  |
| <b>WC-AAF2</b> | ARG61(N1)...dCTP(O2G)  | 62.18  |
|                | ARG61(N1)...dCTP(O3B)  | 5.80   |
|                | ARG61(N1)...dCTP(O3G)  | 84.48  |
|                | ARG61(N2)...dCTP(O1B)  | 7.88   |
|                | ARG61(N2)...dCTP(O2G)  | 3.65   |
|                | ARG61(N2)...dCTP(O3B)  | 98.78  |
|                | ARG61(N2)...dCTP(O3G)  | 49.80  |
|                | dCTP(O3')...dCTP(O1B)  | 1.55   |
|                | CYS37(N)...dCTP(O1G)   | 2.70   |
|                | CYS37(N)...dCTP(O3B)   | 61.05  |

|                |                        |        |
|----------------|------------------------|--------|
| <b>WC-AAF2</b> | CYS37(N)...dCTP(O3G)   | 83.10  |
|                | LYS214(NZ)...dCTP(O1G) | 9.59   |
|                | LYS214(NZ)...dCTP(O2G) | 16.80  |
|                | LYS214(NZ)...dCTP(O3G) | 37.59  |
|                | LYS214(NZ)...dCTP(O1G) | 12.68  |
|                | LYS214(NZ)...dCTP(O2G) | 23.77  |
|                | LYS214(NZ)...dCTP(O3G) | 37.30  |
|                | LYS214(NZ)...dCTP(O1G) | 7.73   |
|                | LYS214(NZ)...dCTP(O2G) | 38.55  |
|                | LYS214(NZ)...dCTP(O3G) | 10.45  |
|                | LYS77(NZ)...dCTP(O2A)  | 27.60  |
|                | LYS77(NZ)...dCTP(O2G)  | 19.58  |
|                | LYS77(NZ)...dCTP(O3A)  | 9.18   |
|                | LYS77(NZ)...dCTP(O2A)  | 60.50  |
|                | LYS77(NZ)...dCTP(O2G)  | 26.83  |
|                | LYS77(NZ)...dCTP(O3A)  | 11.93  |
|                | LYS77(NZ)...dCTP(O2A)  | 25.39  |
|                | LYS77(NZ)...dCTP(O2G)  | 60.00  |
|                | LYS77(NZ)...dCTP(O3A)  | 10.30  |
|                | PHE38(N)...dCTP(O1B)   | 2.23   |
|                | PHE38(N)...dCTP(O2B)   | 64.88  |
|                | THR65(OG1)...dCTP(O1B) | 100.00 |
|                | TYR39(N)...dCTP(O3')   | 87.68  |

|                |                        |       |
|----------------|------------------------|-------|
| <b>WC-AAF3</b> | ARG61(N1)...dCTP(O2G)  | 7.08  |
|                | ARG61(N1)...dCTP(O3B)  | 38.75 |
|                | ARG61(N1)...dCTP(O3G)  | 92.75 |
|                | ARG61(N2)...dCTP(O1B)  | 27.39 |
|                | ARG61(N2)...dCTP(O2G)  | 1.30  |
|                | ARG61(N2)...dCTP(O3B)  | 99.33 |
|                | ARG61(N2)...dCTP(O3G)  | 18.83 |
|                | CYS37(N)...dCTP(O3B)   | 65.78 |
|                | CYS37(N)...dCTP(O3G)   | 46.68 |
|                | LYS214(NZ)...dCTP(O1G) | 19.78 |
|                | LYS214(NZ)...dCTP(O2G) | 17.18 |
|                | LYS214(NZ)...dCTP(O3G) | 4.85  |
|                | LYS214(NZ)...dCTP(O1G) | 19.58 |
|                | LYS214(NZ)...dCTP(O2G) | 38.00 |
|                | LYS214(NZ)...dCTP(O3G) | 8.65  |
|                | LYS214(NZ)...dCTP(O1G) | 16.18 |
|                | LYS214(NZ)...dCTP(O2G) | 39.70 |
|                | LYS214(NZ)...dCTP(O3G) | 5.73  |
|                | LYS77(NZ)...dCTP(O2A)  | 48.18 |
|                | LYS77(NZ)...dCTP(O2G)  | 27.78 |
|                | LYS77(NZ)...dCTP(O3A)  | 10.08 |
|                | LYS77(NZ)...dCTP(O2A)  | 22.55 |
|                | LYS77(NZ)...dCTP(O2G)  | 48.60 |
|                | LYS77(NZ)...dCTP(O3A)  | 7.45  |

|                |                        |        |
|----------------|------------------------|--------|
| <b>WC-AAF3</b> | LYS77(NZ)...dCTP(O2A)  | 27.80  |
|                | LYS77(NZ)...dCTP(O2G)  | 22.95  |
|                | LYS77(NZ)...dCTP(O3A)  | 7.40   |
|                | PHE38(N)...dCTP(O1B)   | 2.18   |
|                | PHE38(N)...dCTP(O2B)   | 93.58  |
|                | THR65(OG1)...dCTP(O1B) | 100.00 |
|                | TYR39(N)...dCTP(O3')   | 91.45  |
|                | TYR39(OH)...dCTP(O2)   | 65.98  |
| <b>WC-AAF4</b> | ARG61(N1)...dCTP(O2G)  | 64.28  |
|                | ARG61(N1)...dCTP(O3B)  | 3.25   |
|                | ARG61(N1)...dCTP(O3G)  | 87.62  |
|                | ARG61(N2)...dCTP(O1B)  | 1.43   |
|                | ARG61(N2)...dCTP(O2G)  | 1.80   |
|                | ARG61(N2)...dCTP(O3B)  | 99.62  |
|                | ARG61(N2)...dCTP(O3G)  | 79.70  |
|                | dCTP(O3')...dCTP(O1B)  | 2.73   |
|                | CYS37(N)...dCTP(O1G)   | 4.05   |
|                | CYS37(N)...dCTP(O3B)   | 59.03  |
|                | CYS37(N)...dCTP(O3G)   | 98.23  |
|                | LYS77(NZ)...dCTP(O2A)  | 38.60  |
|                | LYS77(NZ)...dCTP(O2G)  | 59.65  |
|                | LYS77(NZ)...dCTP(O3A)  | 7.70   |
|                | LYS77(NZ)...dCTP(O2A)  | 40.00  |
|                | LYS77(NZ)...dCTP(O2G)  | 18.68  |

|                |                        |        |
|----------------|------------------------|--------|
| <b>WC-AAF4</b> | LYS77(NZ)...dCTP(O3A)  | 37.39  |
|                | LYS77(NZ)...dCTP(O2A)  | 28.80  |
|                | LYS77(NZ)...dCTP(O2G)  | 45.30  |
|                | LYS77(NZ)...dCTP(O3A)  | 11.65  |
|                | PHE38(N)...dCTP(O1B)   | 1.62   |
|                | PHE38(N)...dCTP(O2B)   | 57.43  |
|                | THR65(OG1)...dCTP(O1B) | 100.00 |
|                | TYR39(N)...dCTP(O3')   | 62.60  |

**Table S7: Hydrogen bond occupancies between the templating dG/dG-AAF and polI for the stable region (last 4 ns) of each trajectory. Amino acid numbering scheme taken from the ternary crystal structure(Nair et al., 2005), PDB ID: 2ALZ. All bonds are represented as donor residue(donor heavy atom)...acceptor residue(acceptor heavy atom), followed by percent occupancy.**

|                      |                           |       |
|----------------------|---------------------------|-------|
| <b>HG Unmodified</b> | dG(N2)...dG(O2P)          | 3.22  |
|                      | LYS60(NZ)...dG(O1P)       | 3.77  |
|                      | LYS60(NZ)...dG(O1P)       | 9.18  |
|                      | LYS60(NZ)...dG(O1P)       | 5.90  |
|                      | SER307(OG)...dG(O1P)      | 32.52 |
|                      | SER307(OG)...dG(O2P)      | 64.88 |
| <b>HG-AAF1</b>       | dG-AAF(N2)...dG-AAF(O2P)  | 59.73 |
|                      | dG-AAF(N2)...dG-AAF(O5')  | 1.33  |
|                      | GLN59(NE2)...dG-AAF(O3')  | 37.18 |
|                      | TYR61(OH)...dG-AAF(O1P)   | 77.88 |
| <b>HG-AAF2</b>       | dG-AAF(N2)...dG-AAF(O2P)  | 61.60 |
|                      | LYS309(NZ)...dG-AAF(O1P)  | 39.03 |
|                      | LYS309(NZ)...dG-AAF(O2P)  | 16.23 |
|                      | LYS309(NZ)...dG-AAF(O1P)  | 11.40 |
|                      | LYS309(NZ)...dG-AAF(O2P)  | 10.98 |
|                      | LYS309(NZ)...dG-AAF(O1P)  | 11.48 |
|                      | LYS309(NZ)...dG-AAF(O2P)  | 38.40 |
|                      | SER307(OG)...dG-AAF(O1P)  | 97.10 |
| <b>HG-AAF3</b>       | dG-AAF(N2)...dG-AAF(O2P)  | 3.08  |
|                      | HIS354(NE2)...dG-AAF(O1P) | 7.10  |
|                      | HIS354(NE2)...dG-AAF(O2P) | 17.20 |
|                      | TYR355(OH)...dG-AAF(O2P)  | 2.43  |



|                        |                           |       |
|------------------------|---------------------------|-------|
| <b>HG-AAF4</b>         | LYS309(NZ)...dG-AAF(O1P)  | 5.93  |
|                        | LYS309(NZ)...dG-AAF(O1P)  | 8.43  |
|                        | LYS309(NZ)...dG-AAF(O1P)  | 6.78  |
| <b>WC Unmodified 1</b> | ARG347(N1)...dG(O2P)      | 52.73 |
|                        | ARG347(N2)...dG(O2P)      | 88.50 |
|                        | dG(N2)...GLN59(OE1)       | 97.84 |
|                        | SER307(OG)...dG(O3')      | 1.32  |
| <b>WC Unmodified 2</b> | dG(N2)...GLN59(OE1)       | 76.76 |
|                        | dT5(O5')...dG(N7)         | 13.90 |
|                        | TYR61(OH)...dG(O1P)       | 13.76 |
| <b>WC-AAF1</b>         | ARG347(N2)...dG-AAF(O2P)  | 1.39  |
|                        | dG-AAF(N2)...GLN59(OE1)   | 97.78 |
|                        | GLN59(NE2)...dG-AAF(O3')  | 65.80 |
|                        | HIS354(NE2)...dG-AAF(O2P) | 3.65  |
|                        | LYS60(NZ)...dG-AAF(O1P)   | 39.50 |
|                        | LYS60(NZ)...dG-AAF(O5')   | 3.18  |
|                        | LYS60(NZ)...dG-AAF(O1P)   | 11.95 |
|                        | LYS60(NZ)...dG-AAF(O5')   | 3.28  |
|                        | LYS60(NZ)...dG-AAF(O1P)   | 11.90 |
|                        | LYS60(NZ)...dG-AAF(O5')   | 2.00  |
|                        | SER307(OG)...dG-AAF(O1P)  | 20.60 |
|                        | SER307(OG)...dG-AAF(O2P)  | 88.03 |

|                |                          |       |
|----------------|--------------------------|-------|
| <b>WC-AAF2</b> | ARG347(N1)...dG-AAF(O1P) | 1.05  |
|                | ARG347(N1)...dG-AAF(O2P) | 59.75 |
|                | ARG347(N1)...dG-AAF(O5') | 6.45  |
|                | ARG347(N2)...dG-AAF(O1P) | 30.59 |
|                | ARG347(N2)...dG-AAF(O2P) | 51.28 |
|                | ARG347(N2)...dG-AAF(O5') | 1.08  |
|                | dG-AAF(N2)...GLN59(OE1)  | 97.10 |
|                | SER307(OG)...dG-AAF(O1P) | 92.05 |
|                | SER307(OG)...dG-AAF(O2P) | 3.25  |
|                | SER307(OG)...dG-AAF(O5') | 4.59  |
| <b>WC-AAF3</b> | dG-AAF(N2)...GLN59(OE1)  | 92.73 |
|                | GLN59(NE2)...dG-AAF(O3') | 19.78 |
|                | LYS309(NZ)...dG-AAF(O1P) | 3.59  |
|                | LYS309(NZ)...dG-AAF(O2P) | 7.88  |
|                | LYS309(NZ)...dG-AAF(O1P) | 3.25  |
|                | LYS309(NZ)...dG-AAF(O2P) | 3.60  |
|                | LYS309(NZ)...dG-AAF(O1P) | 4.40  |
|                | LYS309(NZ)...dG-AAF(O2P) | 3.62  |
|                | LYS60(NZ)...dG-AAF(O1P)  | 12.03 |
|                | LYS60(NZ)...dG-AAF(O3')  | 2.08  |
|                | LYS60(NZ)...dG-AAF(O5')  | 6.55  |
|                | LYS60(NZ)...dG-AAF(O1P)  | 10.70 |
|                | LYS60(NZ)...dG-AAF(O3')  | 2.80  |

|                |                          |       |
|----------------|--------------------------|-------|
| <b>WC-AAF3</b> | LYS60(NZ)...dG-AAF(O5')  | 4.80  |
|                | LYS60(NZ)...dG-AAF(O1P)  | 10.28 |
|                | LYS60(NZ)...dG-AAF(O3')  | 2.55  |
|                | LYS60(NZ)...dG-AAF(O5')  | 3.80  |
|                | SER307(OG)...dG-AAF(O2P) | 1.93  |
|                | SER307(OG)...dG-AAF(O3') | 1.20  |
| <b>WC-AAF4</b> | ARG347(N2)...dG-AAF(O2P) | 4.37  |
|                | dG-AAF(N2)...GLN59(OE1)  | 99.80 |
|                | LEU62(N)...dG-AAF(OAce)  | 1.63  |
|                | LYS60(NZ)...dG-AAF(O3')  | 1.77  |
|                | LYS60(NZ)...dG-AAF(O3')  | 1.93  |
|                | LYS60(NZ)...dG-AAF(O3')  | 2.63  |
|                | SER307(OG)...dG-AAF(O1P) | 43.37 |
|                | SER307(OG)...dG-AAF(O2P) | 21.62 |
|                | TYR61(N)...dG-AAF(OAce)  | 5.60  |

**Table S8: Mg<sup>2+</sup> coordination distances for the stable region (last 4 ns) of each trajectory, presented as mean values  $\pm$  standard deviation.**

|                                  | Mg <sub>A</sub> -Asp126<br>Oδ1 (Å) | Mg <sub>A</sub> -Gln127<br>Oε2 (Å) | Mg <sub>A</sub> -Asp34<br>Oδ2 (Å) | Mg <sub>A</sub> -O3' (Å) | Mg <sub>A</sub> -dCTP<br>O1α (Å) | Mg <sub>A</sub> -H <sub>2</sub> O (Å) |
|----------------------------------|------------------------------------|------------------------------------|-----------------------------------|--------------------------|----------------------------------|---------------------------------------|
| <b>Initial Model<sup>a</sup></b> | 3.14                               | 2.32                               | 2.85                              | 2.84                     | 2.37                             | 2.14                                  |
| <b>HG<br/>Unmodified</b>         | 1.9±0.05                           | 1.9±0.04                           | 1.9±0.05                          | 2.1±1.04                 | 2.0±0.23                         | 2.0±0.06                              |
| <b>HG-AAF1</b>                   | 1.9±0.05                           | 1.9±0.04                           | 1.9±0.05                          | 2.1±0.09                 | 3.8±0.16                         | 2.0±0.05                              |
| <b>HG-AAF2</b>                   | 1.9±0.05                           | 1.9±0.06                           | 1.9±0.05                          | 8.4±1.42                 | 3.1±0.33                         | 2.0±0.06                              |
| <b>HG-AAF3</b>                   | 1.9±0.05                           | 1.9±0.04                           | 1.9±0.05                          | 5.3±0.93                 | 2.2±0.25                         | 2.0±0.07                              |
| <b>HG-AAF4</b>                   | 1.9±0.05                           | 1.9±0.04                           | 1.9±0.05                          | 2.1±0.09                 | 2.0±0.09                         | 2.0±0.07                              |
| <b>WC<br/>Unmodified 1</b>       | 1.9±0.05                           | 1.9±0.04                           | 1.9±0.05                          | 2.1±0.09                 | 2.0±0.26                         | 2.0±0.06                              |
| <b>WC<br/>Unmodified 2</b>       | 1.9±0.05                           | 1.9±0.04                           | 1.9±0.05                          | 2.1±0.08                 | 2.0±0.13                         | 2.0±0.07                              |
| <b>WC-AAF1</b>                   | 1.9±0.05                           | 1.9±0.04                           | 1.9±0.05                          | 2.1±0.09                 | 2.2±0.38                         | 2.0±0.06                              |
| <b>WC-AAF2</b>                   | 1.9±0.05                           | 1.9±0.04                           | 1.9±0.05                          | 2.1±0.09                 | 2.0±0.12                         | 2.0±0.06                              |
| <b>WC-AAF3</b>                   | 1.9±0.04                           | 2.0±0.30                           | 1.9±0.05                          | 2.1±0.09                 | 3.3±0.34                         | 2.0±0.06                              |
| <b>WC-AAF4</b>                   | 1.9±0.05                           | 1.9±0.04                           | 1.9±0.05                          | 2.1±0.08                 | 1.9±0.17                         | 2.0±0.07                              |

<sup>a</sup> Coordination distances in the initial model are as in crystal structure PDB ID: 2ALZ, except for the primer terminal O3', which has been modeled due to its absence in the crystal.

**Table S8 continued: Mg<sup>2+</sup> coordination distances for the stable region (last 4 ns) of each trajectory, presented as mean values  $\pm$  standard deviation.**

|                                  | Mg <sub>B</sub> -Asp126 O $\delta$ 2 (Å) | Mg <sub>B</sub> -Asp34 O $\delta$ 1 (Å) | Mg <sub>B</sub> -Leu35 O (Å) | Mg <sub>B</sub> -dCTP O1 $\alpha$ (Å) | Mg <sub>B</sub> -dCTP O1 $\gamma$ (Å) | Mg <sub>B</sub> -dCTP O2 $\beta$ (Å) |
|----------------------------------|------------------------------------------|-----------------------------------------|------------------------------|---------------------------------------|---------------------------------------|--------------------------------------|
| <b>Initial Model<sup>a</sup></b> | 2.08                                     | 2.15                                    | 2.12                         | 2.36                                  | 2.37                                  | 2.12                                 |
| <b>HG Unmodified</b>             | 1.9 $\pm$ 0.05                           | 1.9 $\pm$ 0.04                          | 1.9 $\pm$ 0.05               | 3.0 $\pm$ 0.43                        | 1.8 $\pm$ 0.04                        | 1.9 $\pm$ 0.05                       |
| <b>HG-AAF1</b>                   | 1.9 $\pm$ 0.52                           | 1.9 $\pm$ 0.05                          | 2.0 $\pm$ 0.08               | 2.0 $\pm$ 0.13                        | 1.8 $\pm$ 0.04                        | 1.9 $\pm$ 0.05                       |
| <b>HG-AAF2</b>                   | 1.9 $\pm$ 0.53                           | 1.9 $\pm$ 0.05                          | 2.0 $\pm$ 0.07               | 2.0 $\pm$ 0.17                        | 1.8 $\pm$ 0.04                        | 1.9 $\pm$ 0.06                       |
| <b>HG-AAF3</b>                   | 1.9 $\pm$ 0.05                           | 1.9 $\pm$ 0.05                          | 1.9 $\pm$ 0.06               | 2.6 $\pm$ 0.32                        | 1.8 $\pm$ 0.04                        | 1.8 $\pm$ 0.05                       |
| <b>HG-AAF4</b>                   | 1.9 $\pm$ 0.05                           | 1.9 $\pm$ 0.04                          | 1.9 $\pm$ 0.05               | 3.2 $\pm$ 0.24                        | 1.8 $\pm$ 0.04                        | 1.8 $\pm$ 0.04                       |
| <b>WC Unmodified 1</b>           | 1.9 $\pm$ 0.05                           | 1.9 $\pm$ 0.04                          | 1.9 $\pm$ 0.05               | 2.8 $\pm$ 0.35                        | 1.8 $\pm$ 0.04                        | 1.9 $\pm$ 0.05                       |
| <b>WC Unmodified 2</b>           | 1.9 $\pm$ 0.05                           | 1.9 $\pm$ 0.04                          | 1.9 $\pm$ 0.05               | 2.8 $\pm$ 0.26                        | 1.8 $\pm$ 0.04                        | 1.9 $\pm$ 0.05                       |
| <b>WC-AAF1</b>                   | 1.9 $\pm$ 0.05                           | 1.9 $\pm$ 0.04                          | 1.9 $\pm$ 0.70               | 2.5 $\pm$ 0.44                        | 1.8 $\pm$ 0.04                        | 1.9 $\pm$ 0.06                       |
| <b>WC-AAF2</b>                   | 1.9 $\pm$ 0.05                           | 1.9 $\pm$ 0.04                          | 1.9 $\pm$ 0.05               | 2.9 $\pm$ 0.39                        | 1.8 $\pm$ 0.04                        | 1.9 $\pm$ 0.05                       |
| <b>WC-AAF3</b>                   | 1.9 $\pm$ 0.05                           | 1.9 $\pm$ 0.05                          | 2.0 $\pm$ 0.07               | 1.9 $\pm$ 0.12                        | 1.8 $\pm$ 0.04                        | 2.0 $\pm$ 0.08                       |
| <b>WC-AAF4</b>                   | 1.9 $\pm$ 0.05                           | 1.9 $\pm$ 0.05                          | 1.9 $\pm$ 0.05               | 3.0 $\pm$ 0.25                        | 1.8 $\pm$ 0.03                        | 1.9 $\pm$ 0.05                       |

<sup>a</sup> Coordination distances in the initial model are as in crystal structure PDB ID: 2ALZ, except for the primer terminal O3', which has been modeled due to its absence in the crystal.

**Table S9: Torsion angles  $\chi$ ,  $\alpha'$ ,  $\beta'$ ,  $\gamma'$ , the pseudorotation phase angle  $P$  of the sugar pucker of dG/dG-AAF, and the in-line attack angle  $O3'-P\alpha-O3\alpha$  for the stable region (last 4 ns) of each trajectory. Data presented as mean  $\pm$  standard deviation.**

| <b>Structure</b>       | $\chi(^{\circ})$ | $P(^{\circ})$    | $\alpha'(^{\circ})$ | $\beta'(^{\circ})$ | $\gamma'(^{\circ})$ | $O3'-P\alpha-O3\alpha(^{\circ})$ |
|------------------------|------------------|------------------|---------------------|--------------------|---------------------|----------------------------------|
| <b>HG Unmodified</b>   | 30.8 $\pm$ 15.3  | 102.7 $\pm$ 15.9 | N/A                 | N/A                | N/A                 | 161.8 $\pm$ 5.2                  |
| <b>HG-AAF1</b>         | 52.2 $\pm$ 9.2   | 50.4 $\pm$ 16.3  | 127.3 $\pm$ 13.2    | 171.8 $\pm$ 13.3   | 316.0 $\pm$ 10.4    | 70.22 $\pm$ 7.5                  |
| <b>HG-AAF2</b>         | 2.6 $\pm$ 21.4   | 175.2 $\pm$ 23.7 | 83.7 $\pm$ 16.7     | 243.9 $\pm$ 9.6    | 192.7 $\pm$ 13.4    | 87.7 $\pm$ 26.62                 |
| <b>HG-AAF3</b>         | 52.2 $\pm$ 11.7  | 159.0 $\pm$ 13.4 | 215.0 $\pm$ 9.7     | 63.7 $\pm$ 10.7    | 203.0 $\pm$ 10.1    | 119.8 $\pm$ 18.0                 |
| <b>HG-AAF4</b>         | 56.9 $\pm$ 8.2   | 64.5 $\pm$ 18.1  | 235.1 $\pm$ 9.9     | 191.6 $\pm$ 12.3   | 318.5 $\pm$ 17.8    | 124.4 $\pm$ 10.3                 |
| <b>WC Unmodified 1</b> | 199.1 $\pm$ 15   | 156.2 $\pm$ 31.4 | N/A                 | N/A                | N/A                 | 167.2 $\pm$ 5.6                  |
| <b>WC Unmodified 2</b> | 247.2 $\pm$ 25   | 164.4 $\pm$ 32.0 | N/A                 | N/A                | N/A                 | 167.7 $\pm$ 5.4                  |
| <b>WC-AAF1</b>         | 195.0 $\pm$ 8.7  | 137.7 $\pm$ 13.5 | 239.8 $\pm$ 11.2    | 258.9 $\pm$ 17.5   | 186.0 $\pm$ 10.9    | 170.2 $\pm$ 5.2                  |
| <b>WC-AAF2</b>         | 175.4 $\pm$ 15.6 | 120.3 $\pm$ 25.8 | 130.3 $\pm$ 11.6    | 126.7 $\pm$ 12.0   | 159.2 $\pm$ 9.5     | 165.2 $\pm$ 5.8                  |
| <b>WC-AAF3</b>         | 200.8 $\pm$ 9.8  | 110.5 $\pm$ 23.6 | 241.0 $\pm$ 9.3     | 72.0 $\pm$ 17.7    | 185.7 $\pm$ 11.9    | 172.2 $\pm$ 4.3                  |
| <b>WC-AAF4</b>         | 171.0 $\pm$ 18.7 | 82.11 $\pm$ 31.9 | 134.9 $\pm$ 14.9    | 306.0 $\pm$ 18.5   | 157.2 $\pm$ 10.6    | 163.4 $\pm$ 5.4                  |
